# Supplementary material
Source: PubMed Central journal article supplement (PMC9803981)
Supplement: mmc2.pdf [file mmc2.pdf]

## Supplementary material

### Suppl. Figure 1

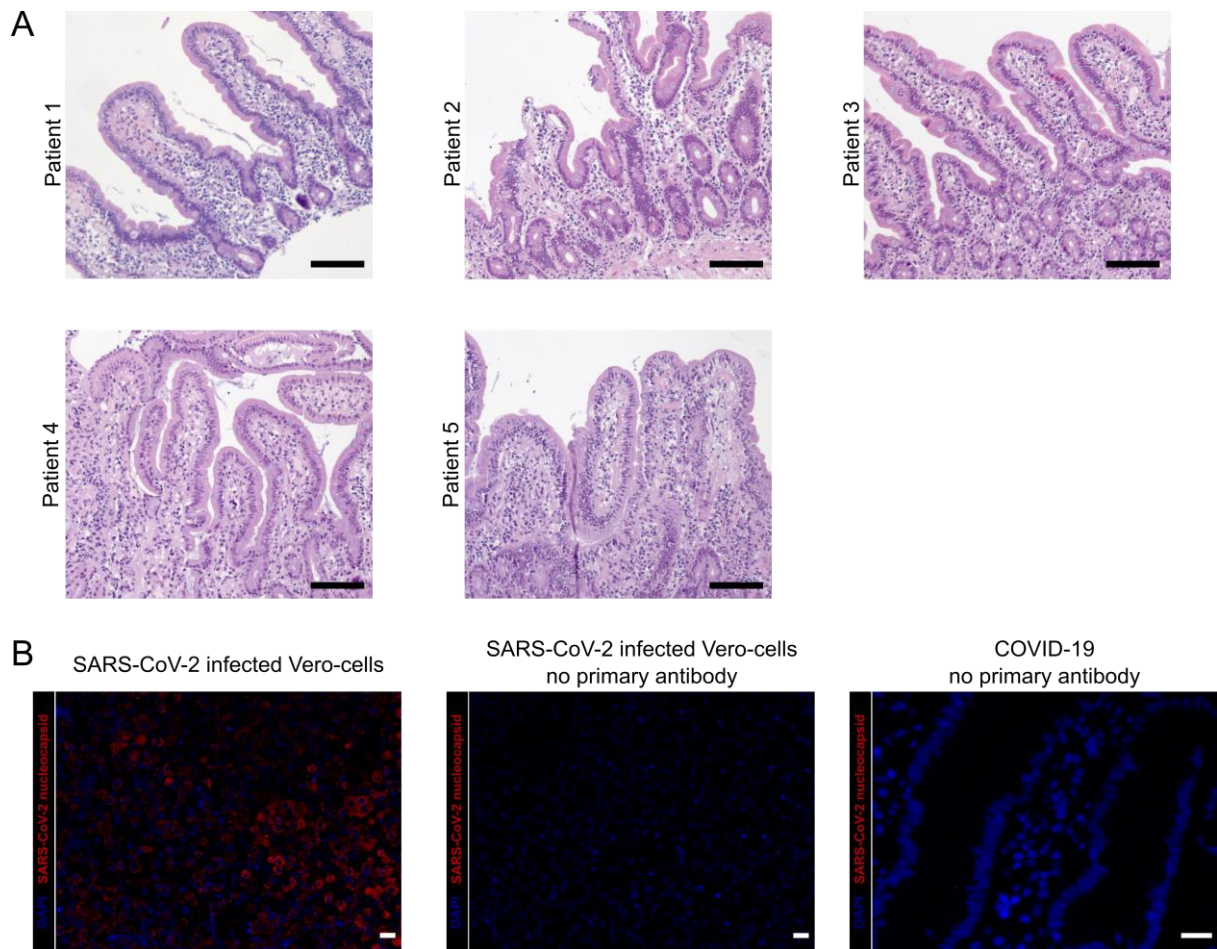

**Suppl. Figure 1: Representative images of duodenal biopsies of COVID-19 patients and controls for immunohistochemical staining of SARS-CoV-2 nucleocapsid (A)** Representative images of H&E staining of duodenal biopsies acquired from patients suffering from COVID-19. Scale bars represent 100  $\mu\text{m}$ . **(B)** Representative images of SARS-CoV-2 nucleocapsid (red) and DAPI (blue) staining of Vero-cells 48 h after infection with SARS-CoV-2 with (left) and without primary antibody (middle) and control of SARS-CoV-2 nucleocapsid (red) and DAPI (blue) staining of a duodenal biopsy from a COVID-19 patient with no primary antibody (right). Scale bars represent 20  $\mu\text{m}$ .

**Suppl. Figure 2**

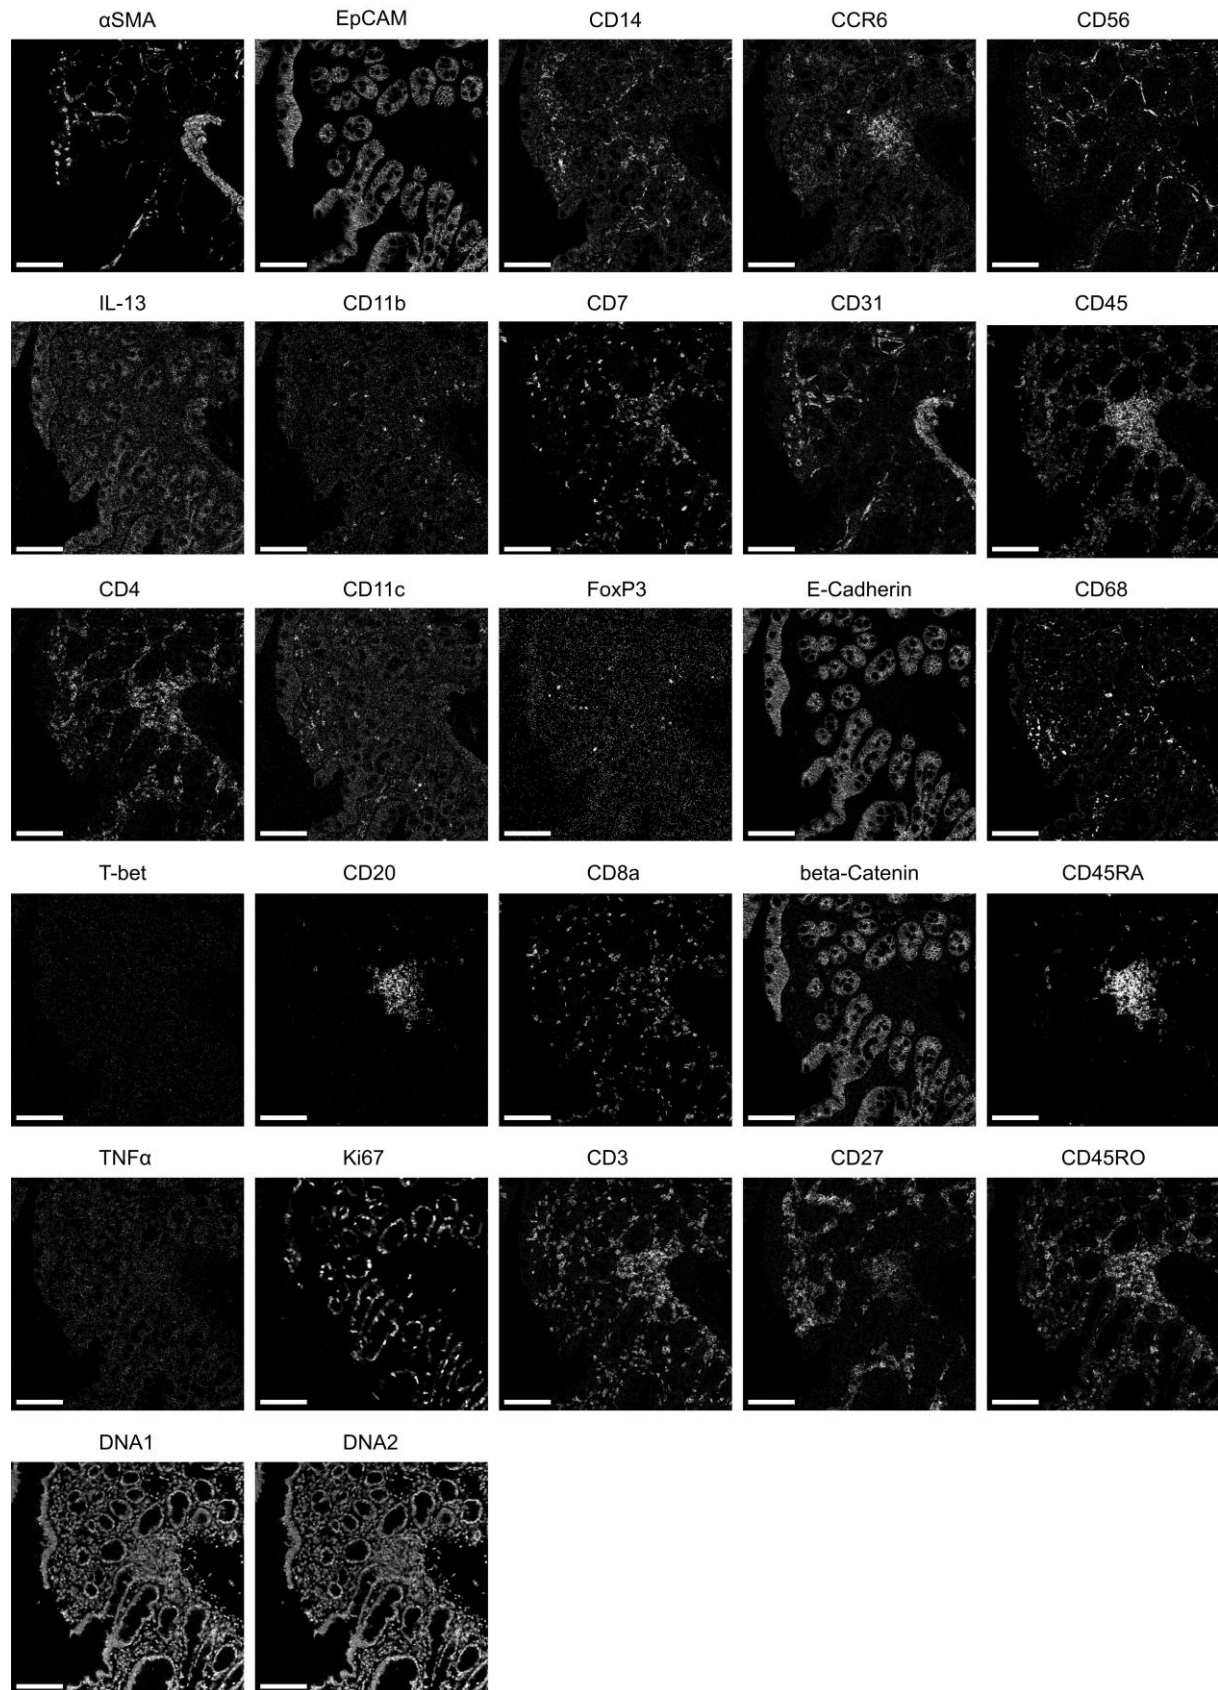

**Suppl. Figure 2: Representative images of each marker used for imaging mass cytometry.**  
The images show representative staining of each marker used in imaging mass cytometry.

Brightness and contrast were adjusted for each image individually. Scale bars represent 100  $\mu\text{m}$ .

### Suppl. Figure 3

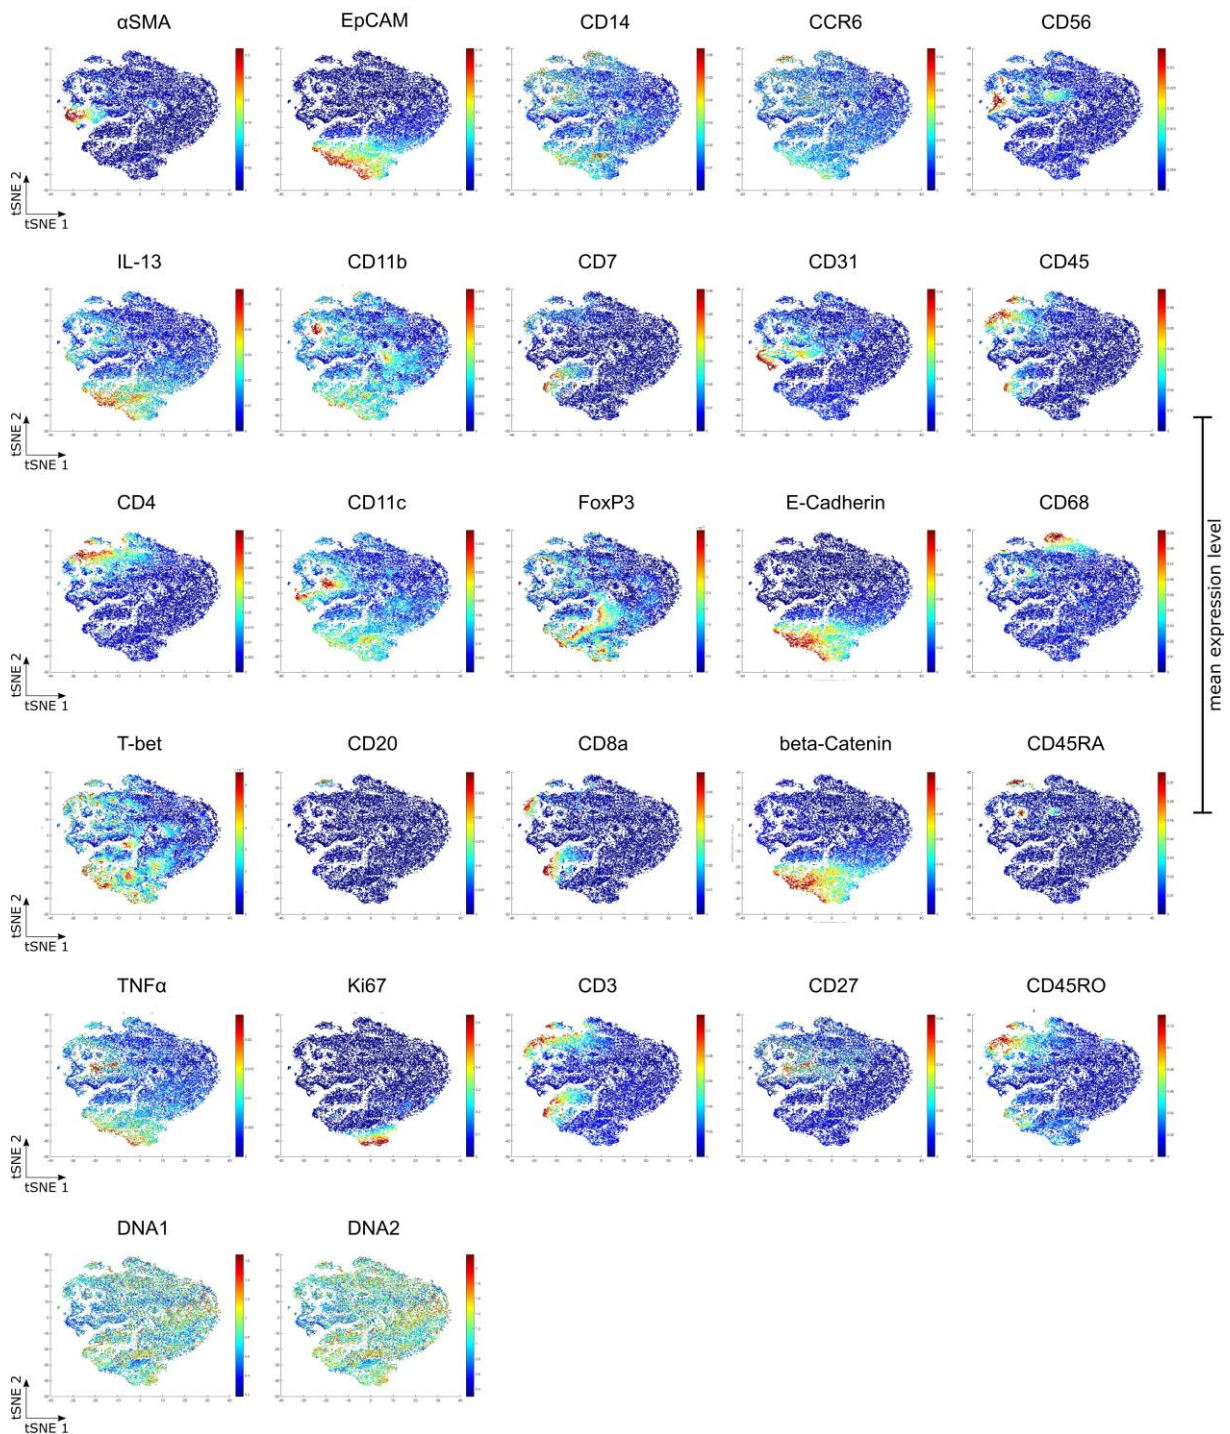

**Suppl. Figure 3: tSNE plot of overall cells overlaid with heatmaps of the respective marker.** The figure shows tSNE plots of all cells overlaid with individual heatmap of each marker measured. Cut-off was set to the 99% percentile. Color spectrum on the left of the plot indicates mean expression levels of the marker (red, high expression; blue, low expression).

Suppl. Figure 4

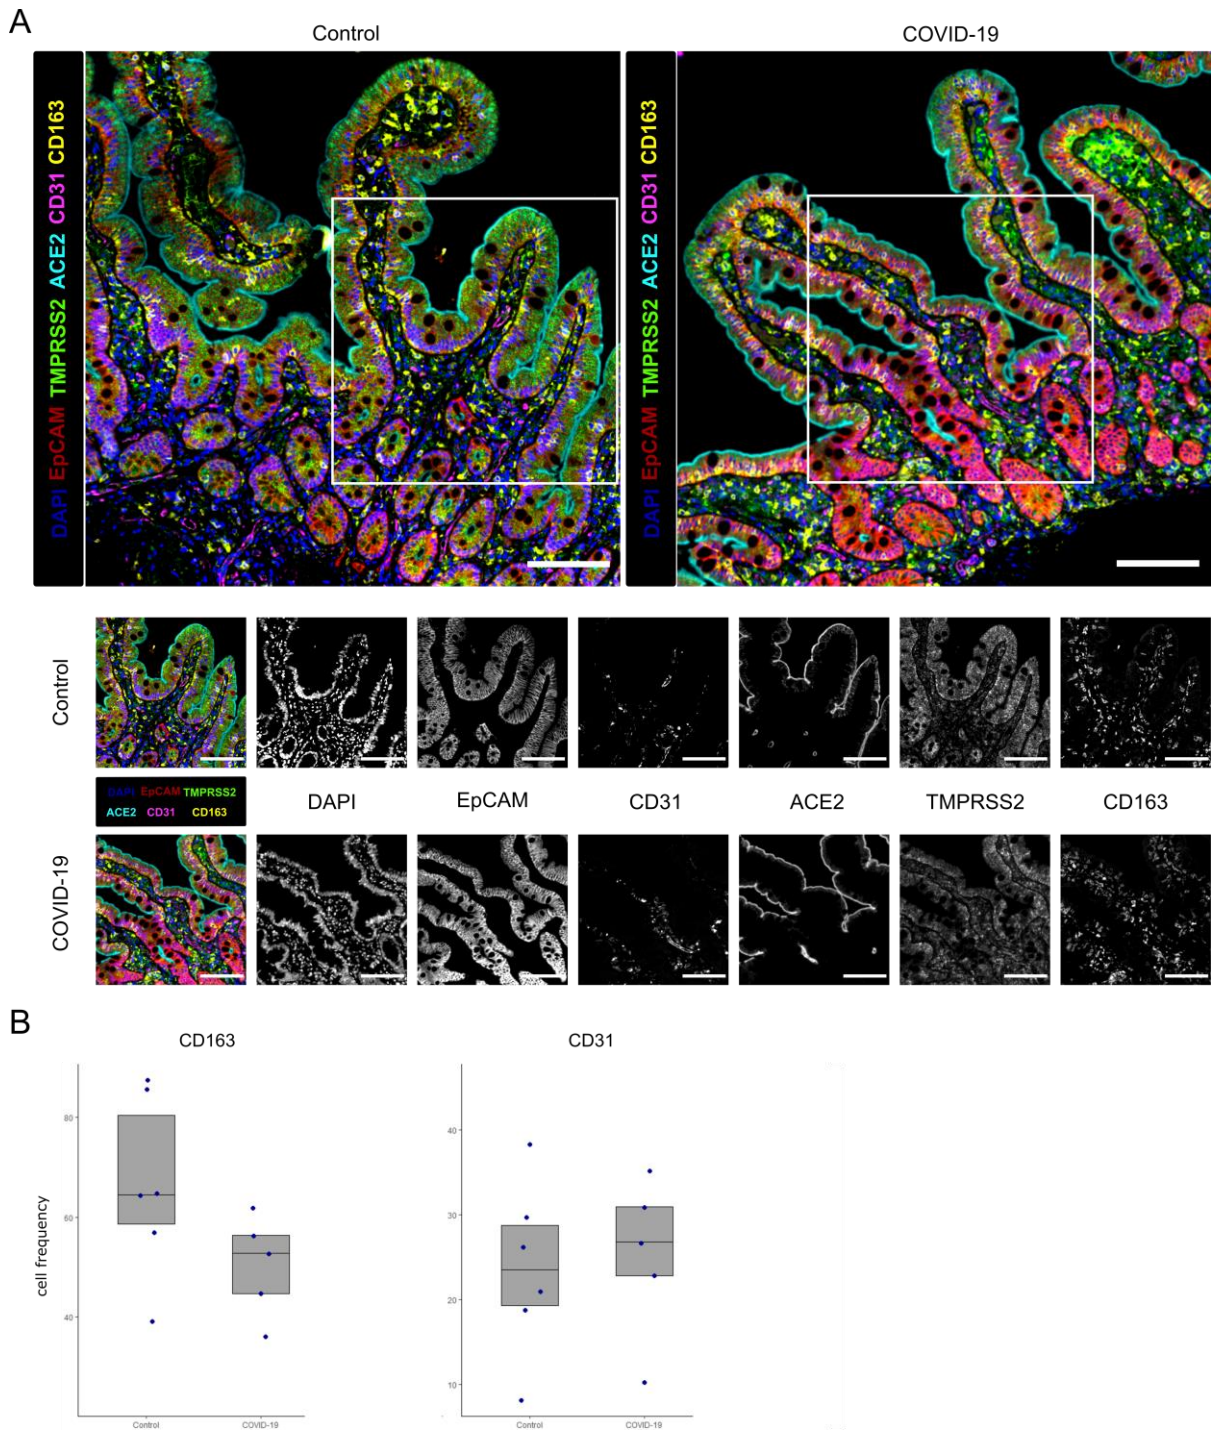

**Suppl. Figure 4: Multiplexing shows expression of SARS-CoV-2 entry proteins on small intestinal enterocytes of COVID-19 patients and no changes in CD31<sup>+</sup> and CD163<sup>+</sup> cells. (A)** Upper row, representative images of immunostaining of EpCAM (red), CD31 (magenta), ACE2 (cyan), TMPRSS2 (green) and CD163 (yellow) and nuclei (DAPI, blue) on sections of control (left) and COVID-19 (right) patients. The color for the respective marker is shown on the left of the image. Lower panels show extracts of upper row pictures (white box) and

single markers. Pictures on the left show merged colors, black and white pictures show individual markers. Scale bars represent 100  $\mu\text{m}$ . **(B)** Box plots of relative cell frequencies of CD163<sup>+</sup> macrophages and CD31<sup>+</sup> endothelial cells within the lamina propria. No significant differences in relative cell frequencies could be observed. Boxes extend from 25<sup>th</sup> to 75<sup>th</sup> percentile, the line depicts the median. Dots represent individual data.

**Suppl. Table 1: Control patients**

| Control patients |     |
|------------------|-----|
| Age              | Sex |
| 85               | M   |
| 79               | M   |
| 52               | F   |
| 62               | F   |
| 75               | M   |
| 77               | F   |
| 61               | M   |
| 49               | M   |
| 80               | F   |

**Suppl. Table 2: Antibodies used for imaging mass cytometry**

| isotope tag       | target     | clone / company                     | catalogue number | dilution |
|-------------------|------------|-------------------------------------|------------------|----------|
| <sup>141</sup> Pr | αSMA       | 1A4 / Fluidigm                      | 3144047D         | 1:2000   |
| <sup>143</sup> Nd | EpCAM      | E6V8Y / Cell Signaling Technologies | 93790            | 1:2000   |
| <sup>144</sup> Nd | CD14       | EPR3653 / Fluidigm                  | 3144025D         | 1:400    |
| <sup>145</sup> Nd | CCR6       | EPR22259 / Abcam                    | 243852           | 1:200    |
| <sup>146</sup> Nd | CD56       | E7X9M / Cell Signaling Technologies | 99756            | 1:200    |
| <sup>147</sup> Sm | IL-13      | polyclonal / Abcam                  | 9576             | 1:200    |
| <sup>149</sup> Sm | CD11b      | EPR1344 / Fluidigm                  | 3149028D         | 1:200    |
| <sup>150</sup> Nd | CD7        | EPR4242 / Abcam                     | 243852           | 1:800    |
| <sup>151</sup> Eu | CD31       | EPR3094 / Fluidigm                  | 3151025D         | 1:100    |
| <sup>152</sup> Sm | CD45       | D9M8I / Fluidigm                    | 3152018D         | 1:4000   |
| <sup>153</sup> Eu | CD4        | EPR6855 / Fluidigm                  | 181724           | 1:400    |
| <sup>154</sup> Sm | CD11c      | polyclonal / Fluidigm               | 3154025D         | 1:100    |
| <sup>155</sup> Gd | FoxP3      | 236A/E7 / Fluidigm                  | 3155016D         | 1:400    |
| <sup>158</sup> Gd | E-Cadherin | 24E19 / Fluidigm                    | 3158029D         | 1:2000   |
| <sup>159</sup> Tb | CD68       | KP1 / Fluidigm                      | 3159035D         | 1:800    |
| <sup>160</sup> Gd | T-Bet      | 4B10 / BioLegend                    | 644802           | 1:200    |
| <sup>161</sup> Dy | CD20       | H1 / Fluidigm                       | 3161029D         | 1:2000   |
| <sup>162</sup> Dy | CD8a       | C8/144B / Fluidigm                  | 3162034D         | 1:1500   |
| <sup>165</sup> Ho | β-Catenin  | D13A1 / Fluidigm                    | 3165032D         | 1:2000   |
| <sup>166</sup> Er | CD45RA     | HI100 / Fluidigm                    | 3166028D         | 1:1000   |
| <sup>167</sup> Er | TNFα       | M1-C4 / Sigma-Aldrich               | SAB1404480       | 1:400    |
| <sup>168</sup> Er | Ki67       | B56 / Fluidigm                      | 3168022D         | 1:1000   |
| <sup>169</sup> Tm | HistonH3   | D1H2 / Cell Signaling Technologies  | 114499           | 1:2000   |
| <sup>170</sup> Er | CD3        | polyclonal / Fluidigm               | 3170019D         | 1:50     |
| <sup>171</sup> Yb | CD27       | LG.3A10 / Fluidigm                  | 3171025D         | 1:200    |
| <sup>173</sup> Yb | CD45RO     | T200/797 / Abcam                    | 212786           | 1:1500   |
| <sup>191</sup> Ir | DNA        | Fluidigm                            | 201192A          | 1:400    |
| <sup>193</sup> Ir | DNA        | Fluidigm                            | 201192A          | 1:400    |



**Suppl. Table 3: Antibodies used for multiplex immunohistochemistry**

| OPAL    | target            | clone      | company                     | catalogue number | dilution |
|---------|-------------------|------------|-----------------------------|------------------|----------|
| Panel 1 |                   |            |                             |                  |          |
| 570     | CD8               | C8/144B    | Agilent                     | IS623            | 1:30     |
| 650     | CD38              | E7Z8C      | Cell Signaling Technologies | 51000            | 1:50.000 |
| 690     | Ki67              | MIB1       | Agilent                     | M7240            | 1:2.000  |
| 520     | EpCAM             | E6V8Y      | Cell Signaling Technologies | 93790            | 1:4.000  |
| Panel 2 |                   |            |                             |                  |          |
| 650     | cleaved caspase-3 | Asp175     | Cell Signaling Technologies | 9661             | 1:1.500  |
| 520     | EpCAM             | E6V8Y      | Cell Signaling Technologies | 93790            | 1:4.000  |
| 570     | CD8               | C8/144B    | Agilent                     | IS623            | 1:30     |
| Panel 3 |                   |            |                             |                  |          |
| 540     | CD163             | 10D6       | Novocastra/Leica            | NCL-L-CD163      | 1:2.000  |
| 620     | CD31              | 89C2       | Cell Signaling Technologies | 3528             | 1:2.000  |
| 690     | ACE2              | EPR4435(2) | Abcam                       | ab108252         | 1:4.000  |
| 570     | TMPRSS2           | EPR3861    | Abcam                       | ab92323          | 1:50.000 |
| 520     | CD8               | C8/144B    | Agilent                     | IS623            | 1:30     |
| 650     | EpCAM             | E6V8Y      | Cell Signaling Technologies | 93790            | 1:4.000  |

**Suppl. Table 4: Designation of phenograph clusters by marker expression**
